# Supplementary material for: Updating the taxonomy of Aspergillus in South Africa
Source: PubMed Central journal article supplement — Stud Mycol. 2020 Mar 13;95:253–92. doi: 10.1016/j.simyco.2020.02.003 (PMC7426233; doi:10.1016/j.simyco.2020.02.003), 2020-03-13
Supplement: mmc1.pdf [file mmc1.pdf]

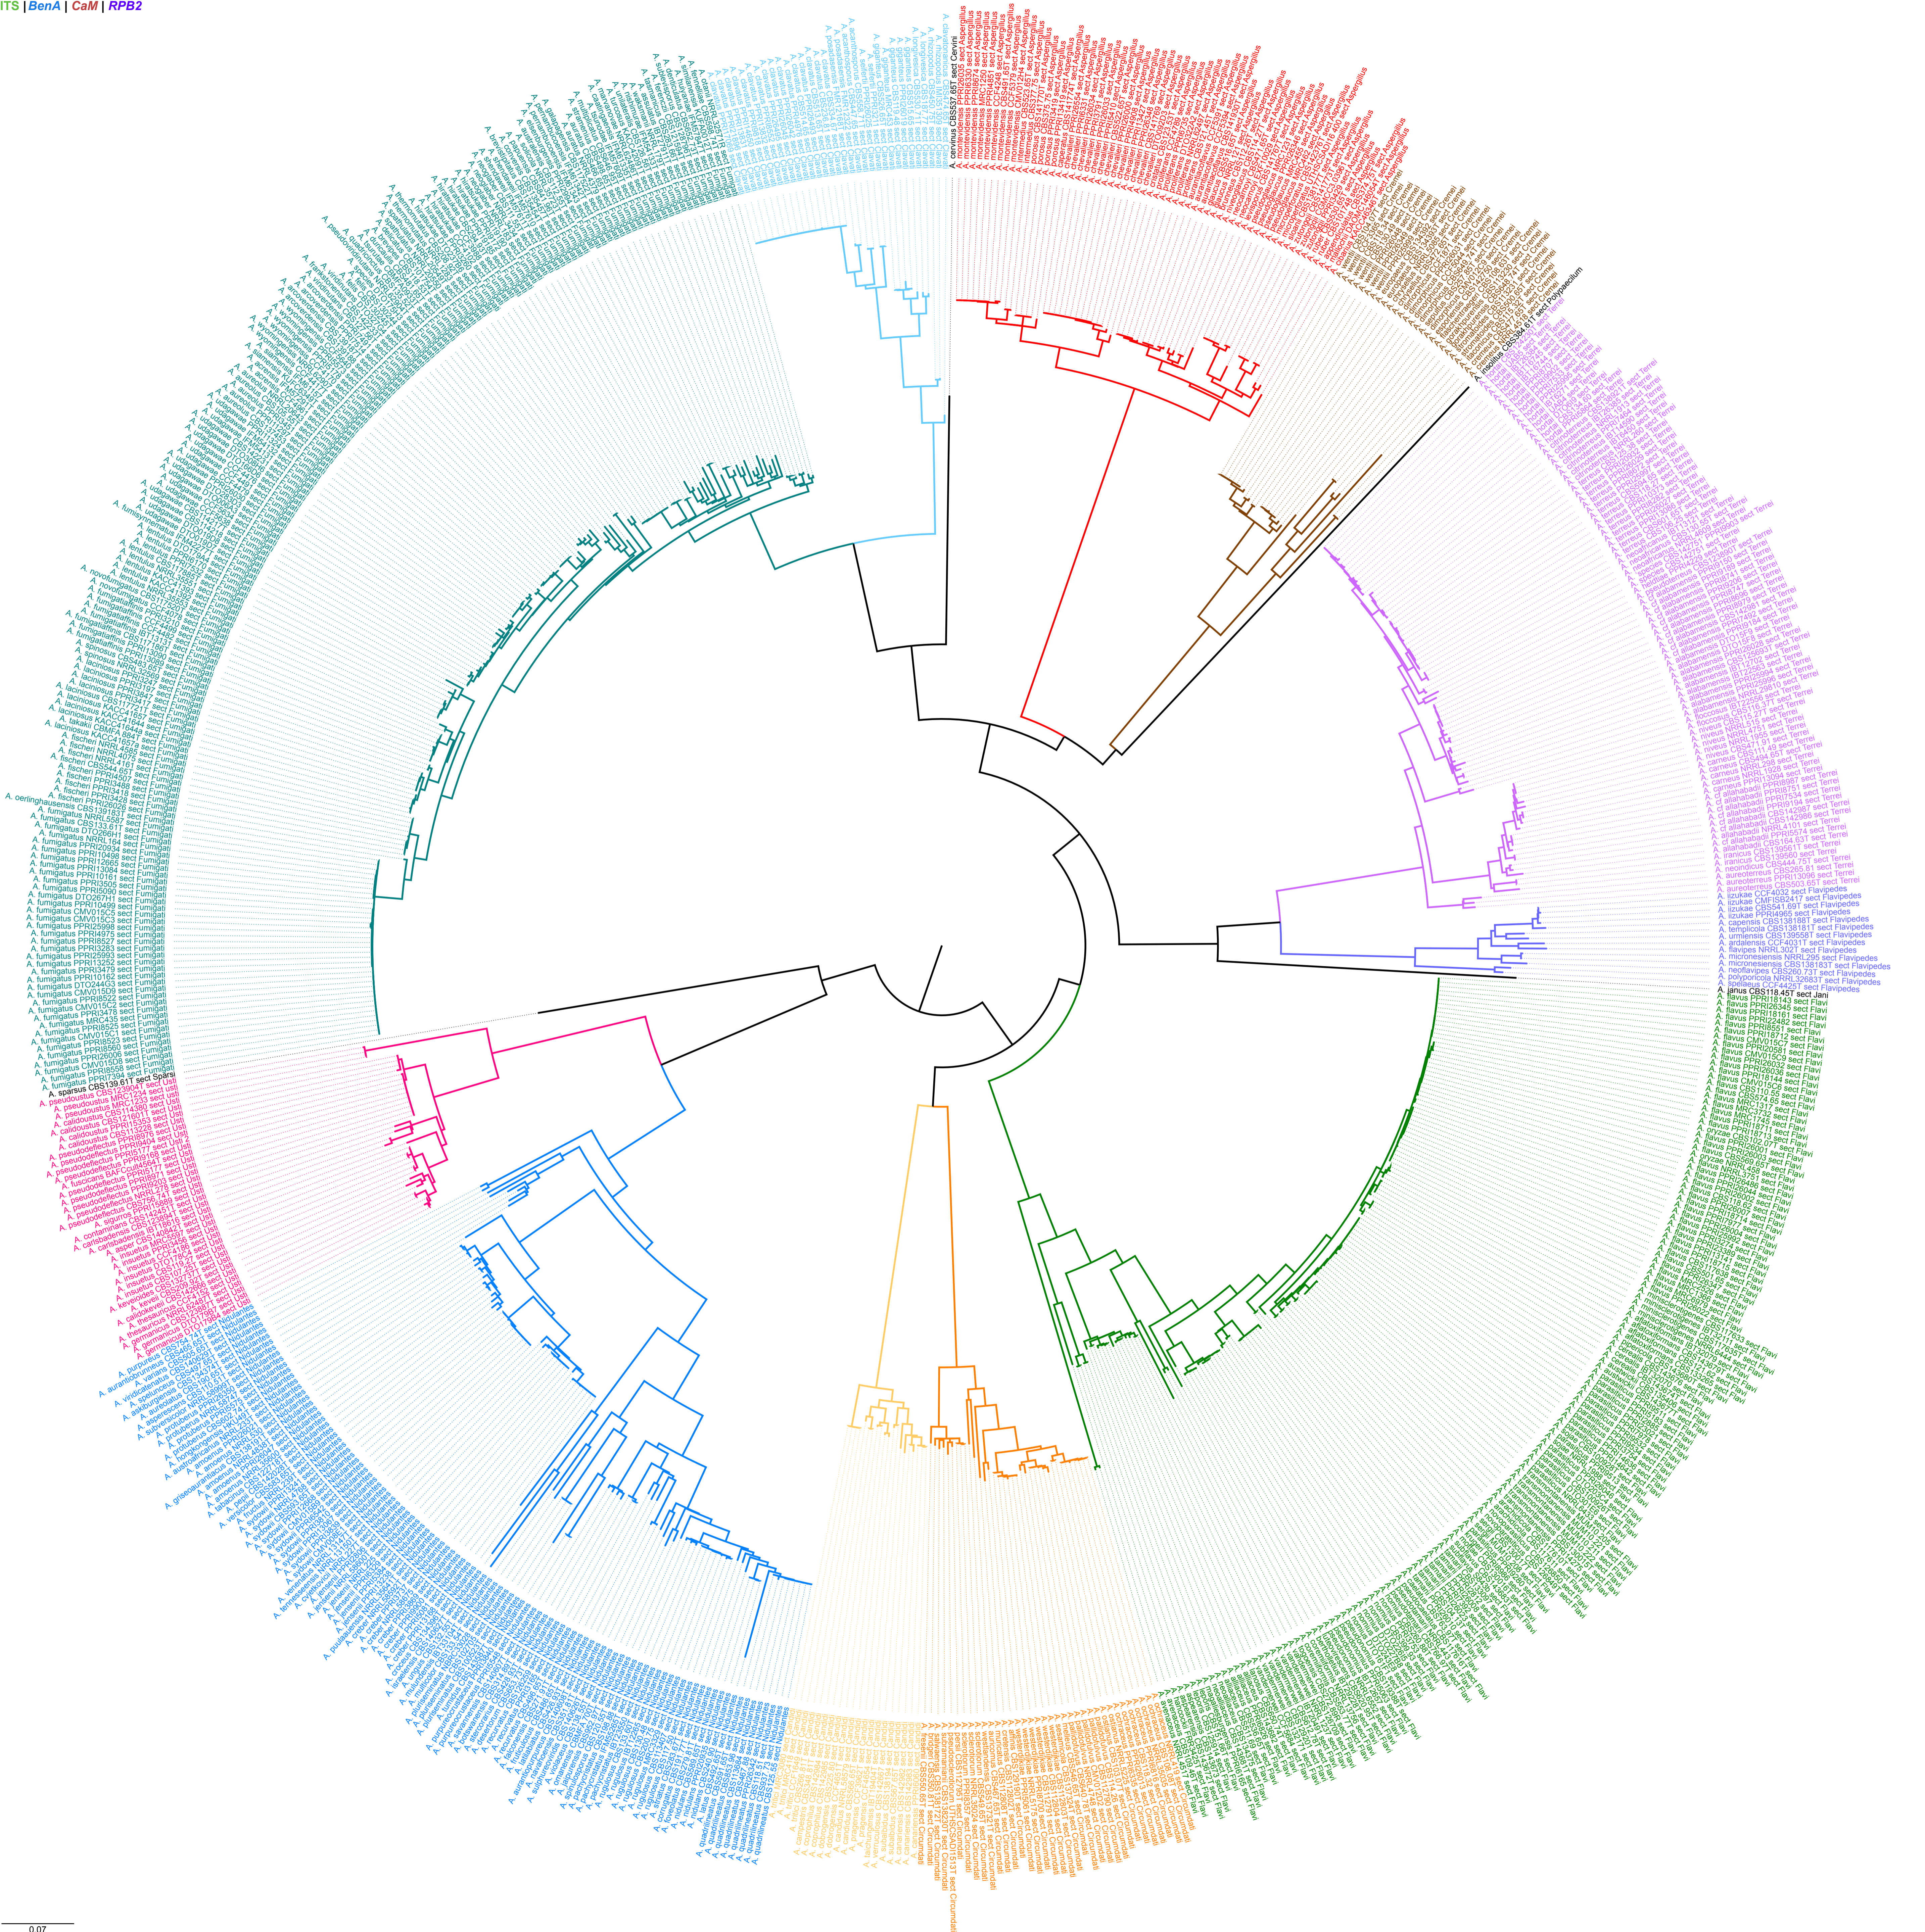

**Suppl Fig 1:** Multigene phylogeny of the genus *Aspergillus* based on a combined ITS, *BenA*, *CaM* and *RPB2* dataset. Nodes and branches are color coded based on its sectional classification. The tree was rooted to its midpoint.
